# Supplementary material for: Largely Typical Electrophysiological Affective Responses to Special Interest Stimuli in Adolescents with Autism Spectrum Disorder
Source: Springer Nature journal article supplement (doi:10.1007/s10803-018-3587-9), 2018-04-21
Supplement: MOESM1 [file 15712026]

**Supplementary Material**

**Supplementary Table 1. Likes and dislikes reported by participants in the TD and ASD groups.** Items that were mentioned by more than one individual within a diagnostic category are bolded, items that are similar or overlapping between diagnostic groups are underlined and items that were mentioned by females are colored in blue. We note also that several items appear in both the ‘like’ and ‘dislike’ categories.

|  | **TD** | **ASD** |
| --- | --- | --- |
| **Likes** | *People:*  Leonardo DiCaprio  Zac Efron  Justin Bieber  **Toby Mac**  Happy Babies  J Cole  **Drake**  *Animals:*  Giraffes  **Cats**  Bunnies  **Puppies**  Elephants  Snakes  Koalas  *Foods:*  Grapes  Bacon  **Burgers/Cheeseburgers**  **Ice cream**  **Pizza**  Kit-Kat Bars  Coca Cola  Nutella  *Entertainment (Books, movies, TV, games):*  Harry Potter  Chronicles of Narnia  Downton Abbey  Young Justice (TV Show)  DC and Marvel Superheroes  Board games  William Joyce Books  The Lunar Chronicles  Star Wars  South Park (TV Show)  Call of Duty  League of Legends (Videogame)  Minecraft  Pokémon  Halo  Friends (TV Shows)  **The Office**  Parks and Recreation  **Brooklyn Nine Nine**  **Sponge Bob**  **Videogames**  Scrubs (TV Show)  Jessica Jones (TV Show)  Modern Family (TV Show)  The Walking Dead (TV Show)  *Activities:*  Biking  Skiing  Space Travel  School  Arts and Crafts  Basketball  **Football**  **Hockey**  Wall Climbing  Soccer  Swimming  *Things/Places:*  Leaves  Flowers  Trees  Space Science  **Guitars**  Lego  Cellphones (Samsung Galaxy S4)  Sunrises/Sunsets  Gardens  **Money**  Make up | *People:*  The Beatles  *Animals:*  **Cats**  **Dogs**  **Dinosaurs**  Hyenas  Wolves  French Bull Dog Puppies  Bees/Behives  Jellyfish  *Foods:*  Chicken  Sushi  Watermelon  Vegetables  Apples  **Pizza**  Baconator  Chicken Strips and Fries  Coca Cola  Carrots  Chocolate  *Entertainment (Books, movies, TV, games):*  Board games  Thomas and Friends  Smash Bros  Books  Scooby Doo  **Mario and Luigi**  Halo  Hiraga Saito  The Familiar of Zero  **Star Wars**  Big Bang Theory  Dota  Dragon Age: Inquisition  **Anime**  **Videogames**  Naruto  Manga  **Minecraft**  The Lion King  Harry Potter  **Mythbusters**  Game of Thrones Books  Lord of the Rings  Treasure Planet  Star Trek  Gravity Falls (TV Show)  **Pokémon**  **Sponge Bob**  Skylanders  Sonic Hedgehog  **Cartoons**  *Activities:*  **Archery**  Dodgeball  Drawing  School  Scouts Camping  **Skiing**  Space Engineering  **Space Travel**  Parkour Gym  Soccer  Swimming  Working Out  Skateboarding  **Tinkering with Technology (building computers/ systems)**  Snowboarding  Sailing  Fishing  Science  Bowling  Football  *Things/Places:*  **Lego**  **Snow**  Pumpkins  Dusk  **Nature**  Ocean Waves  Coulees  Money  Chapters (book store)  Speed Boats  Disney World  Halloween  Fast cars  Beaches |
| **Dislikes** | *People:*  Babies Crying  **Sick Children/Illness**  Michael Jackson  *Animals:*  **Spiders**  Rats  **Mosquitoes**  **Cockroaches**  **Worms**  Centipedes  Flies  **Wasps**  Snakes  Pigeons  Insects  *Foods:*  Bell Peppers  Asparagus  Black Licorice / Licorice  **Bananas**  **Meat**  Pickles  Lobster  Tomatoes  **Mushrooms**  Fast Food  Tacos  *Entertainment:*  Glitter Force  Clowns  Board Games  *Activities:*  Shovelling Snow  Weight Lifting  Living with Parents  Ballet  Ice Skating  Shopping  Writing  **Homework**  Writing  **Chores**  Bullying  Basketball  **Football**  **Math**  Calculus  Soccer  Golf  Bowling  Baseball  Hockey  *Things/Places:*  Mold  Cold weather  Guns  Dirty dishes  Crowded Buses  Garbage  Snow  Makeup | *People:*  Justin Bieber  **Babies Crying**  *Animals:*  Dogs  Scorpions  **Cockroaches**  **Mosquitoes**  **Worms**  **Spiders**  **Centipedes**  *Foods:*  **Avocados**  Ketchup  Celery  Broccoli  Asparagus  Brussel Sprouts  Pears  Peppers  Onions  Pineapples  Candy  Fruits  Vegetables  Apples  Peas  **Corn**  *Entertainment:*  Monopoly  South Park  King of the Hill  **Family Guy**  My Little Pony  Anime  Piano Music  Harry Potter  The Simpsons  *Activities:*  Basketball  Ice Skating  Swimming  **Soccer**  **Volleyball**  Water Polo  Getting water in the face  **Chores**  **Homework**  **Long Drives**  **Being cold**  **Bullying**  Shopping  **Hockey**  **Baseball**  **Basketball**  Laundry  **Football**  Being sick  Smoking  School Exams  Running  Reading  *Things/Places:*  Bare feet  **Loud Noises**  Big Box Stores  Close up pictures  **Needles**  **Garbage**  Snowstorms  Deep Water  School  Bad Smells  **Crowds**  Dirty dishes  Floods  Messy Rooms  Traffic  **Pollution** |
